# Supplementary material
Source: Research Square preprint supplement (doi:10.21203/rs.3.rs-9280394/v1)
Supplement: Supplementary file 1 [file 8540c1fed85dbbc855029de6.pdf]

**Figure S1**

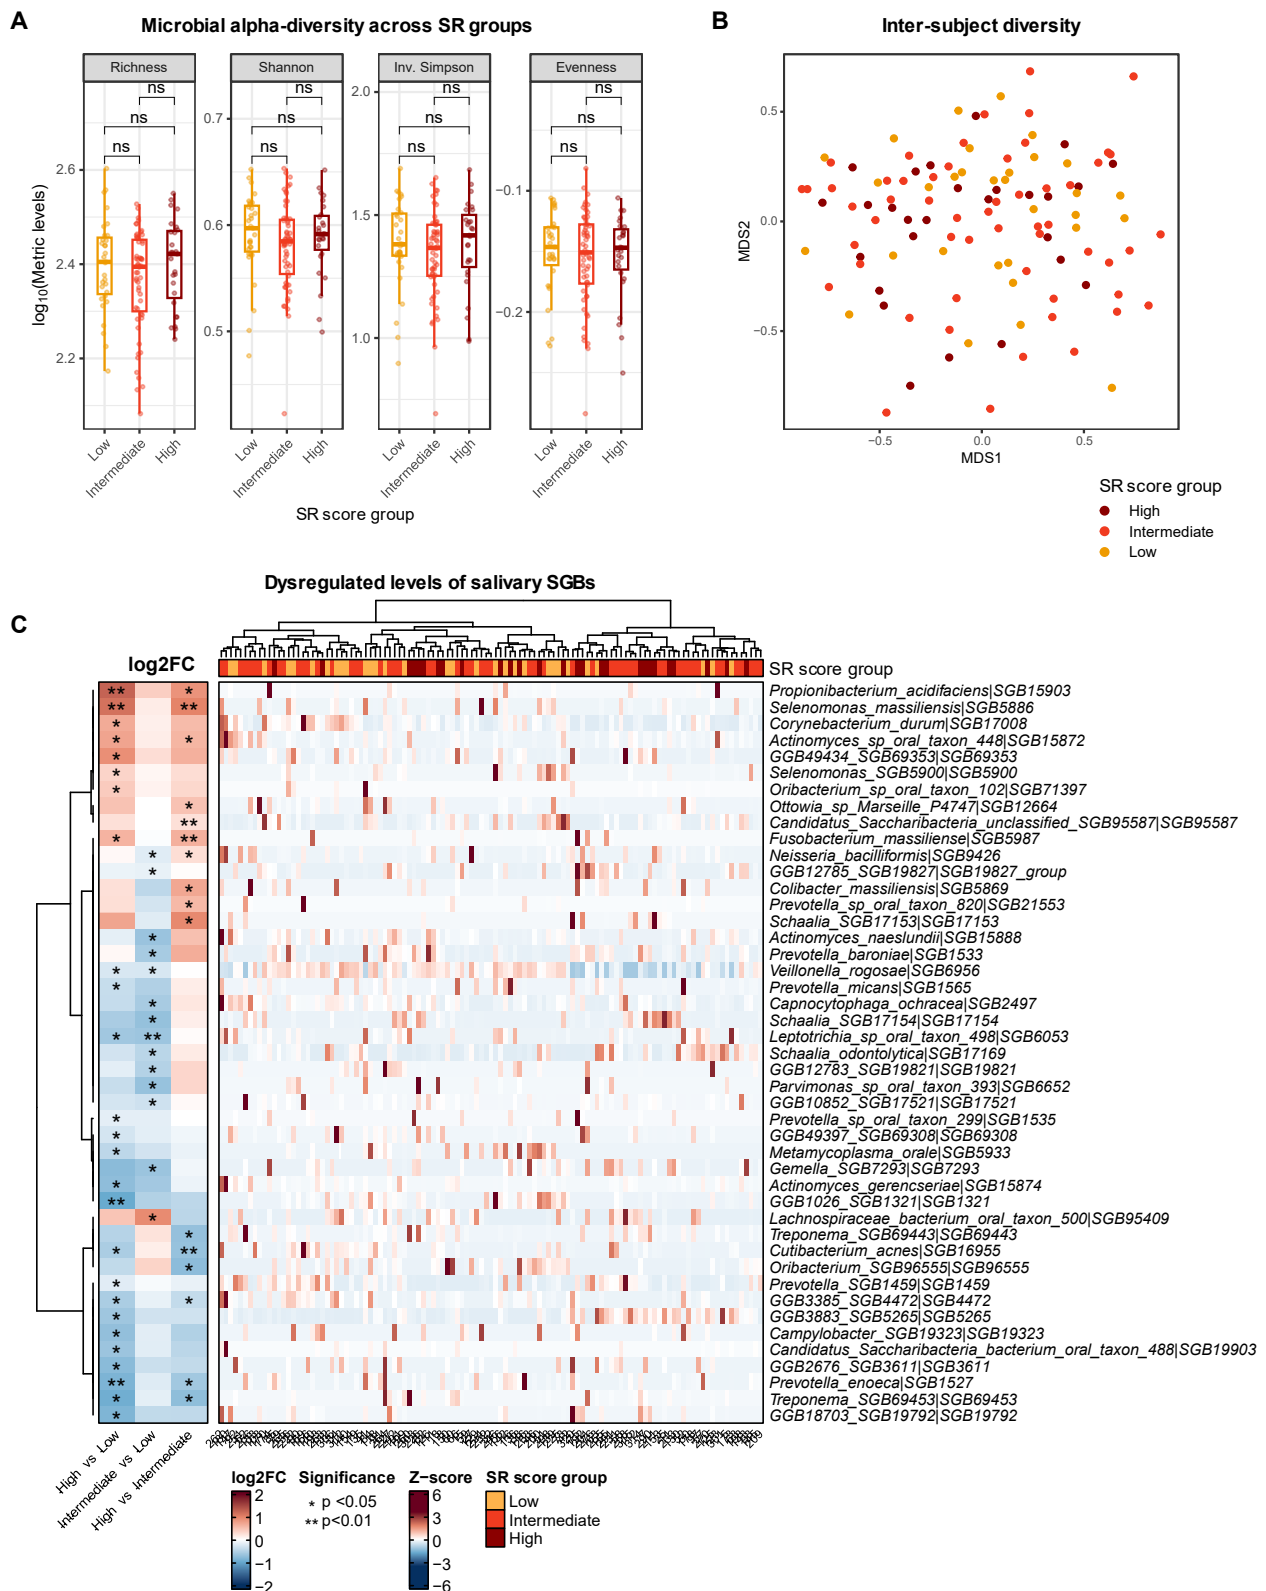

**Figure S1.** Analysis of salivary metagenomic profiles. **A)** Box plots reporting alpha-diversity metrics across SR groups. The significance was evaluated by Wilcoxon Rank-Sum test. **B)** Nonmetric multidimensional scaling plot based on inter-subject Bray-Curtis' dissimilarity. The color reflects SR group. **C)** Heatmap reporting the log<sub>2</sub>FC (left) and Z-score (right) of all the differentially abundant SGBs in at least one comparison. For each subject, the SR group is reported. \*p < 0.05; \*\*p < 0.01.
